# Supplementary material
Source: Springer Nature journal article supplement (https://www.springermedizin.de/resource/supplementary/12913_2011_1845_MOESM4_ESM.pdf/9529130)
Supplement: MOESM4 [file 9529130]

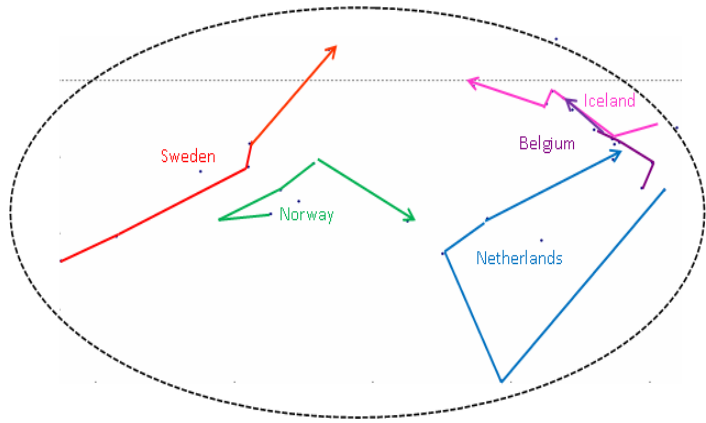

Part a. Bottom left quadrant

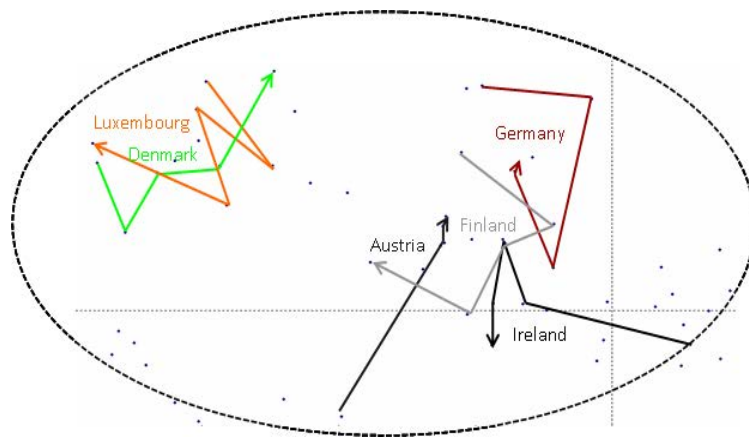

Part b. Top left quadrant

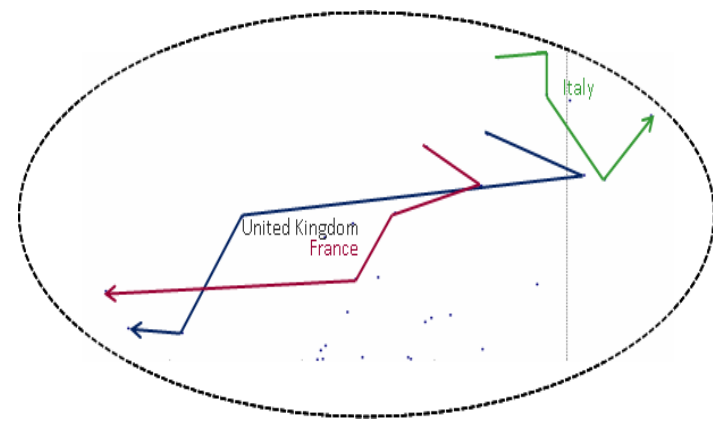

Part c. Top left quadrant

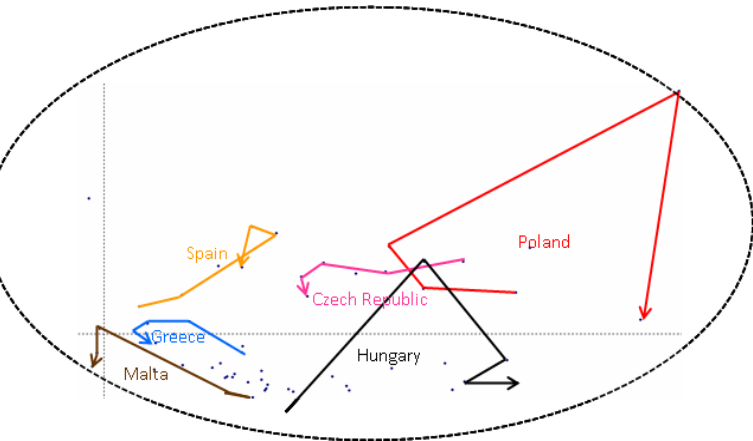

Part d. Top right quadrant

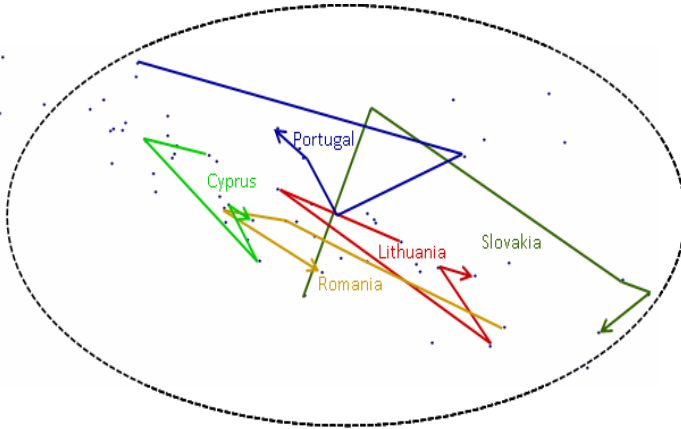

Part e. Bottom right quadrant

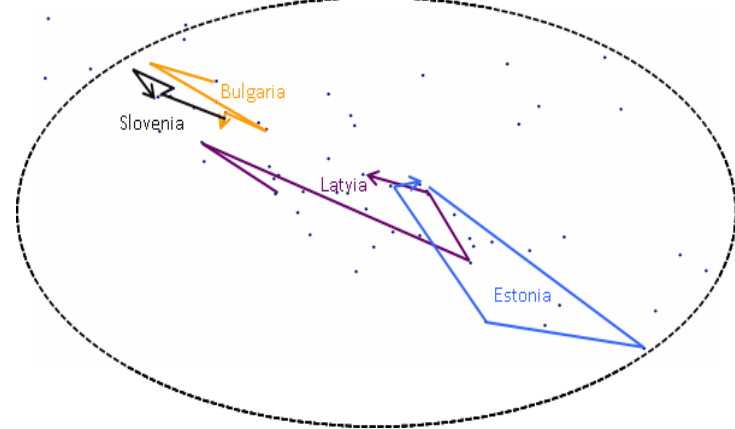

Part f. Bottom right quadrant
